# Supplementary material for: Exercise Counteracts the Deleterious Effects of Cancer Cachexia
Source: MDPI journal article supplement (doi:10.3390/cancers14102512), 2022-05-19
Supplement: s1 [file s1]

## Supplementary Materials

# Exercise Counteracts the Deleterious Effects of Cancer Cachexia

Stavroula Tsitkanou, Kevin A. Murach, Tyrone A. Washington and Nicholas P. Greene

**Table S1.** Ongoing clinical trials with exercise-based interventions in cancer patients (source: <https://clinicaltrials.gov>).

| Title of Study                                                                                                                                                                                                      | Type of Cancer                                           | Location(s) Study Conducts                                                                                                                                                                                                                                                                                                                                                                                                                                                                                                                                                                                                                                                                                             |
|---------------------------------------------------------------------------------------------------------------------------------------------------------------------------------------------------------------------|----------------------------------------------------------|------------------------------------------------------------------------------------------------------------------------------------------------------------------------------------------------------------------------------------------------------------------------------------------------------------------------------------------------------------------------------------------------------------------------------------------------------------------------------------------------------------------------------------------------------------------------------------------------------------------------------------------------------------------------------------------------------------------------|
| Lung Cancer Exercise Training Study                                                                                                                                                                                 | Lung Cancer                                              | Memorial Sloan Kettering Cancer Center, New York, New York, United States                                                                                                                                                                                                                                                                                                                                                                                                                                                                                                                                                                                                                                              |
| Effects of a Physical Exercise and Health Education Program for Women With Breast Cancer Undergoing Chemotherapy                                                                                                    | Breast cancer                                            | Hospital Municipal Vila Santa Catarina, São Paulo, Brazil                                                                                                                                                                                                                                                                                                                                                                                                                                                                                                                                                                                                                                                              |
| Part II: Exercise in Hispanic Breast Cancer Survivors                                                                                                                                                               | Breast cancer                                            | i) University of Texas MD Anderson Cancer Center, Houston, Texas, United States, ii) University of Puerto Rico, San Juan, Puerto Rico                                                                                                                                                                                                                                                                                                                                                                                                                                                                                                                                                                                  |
| Precision-exercise-prescription for Lung Cancer Patients Undergoing Surgery: The PEP Study                                                                                                                          | i) Non Small Cell Lung Cancer, ii) Secondary Lung Cancer | Huntsman Cancer Institute, Salt Lake City, Utah, United States                                                                                                                                                                                                                                                                                                                                                                                                                                                                                                                                                                                                                                                         |
| The Active After Cancer Trial (AACT)                                                                                                                                                                                | i) Breast Cancer, ii) Colorectal Cancer                  | i) University of California at San Diego, La Jolla, California, United States, ii) University of California San Francisco, San Francisco, California, United States, iii) Dana-Farber Cancer Institute, Boston, Massachusetts, United States, iv) New Hampshire Oncology Hematology, Concord, New Hampshire, United States, v) Lakes Regional Healthcare Hematology Oncology, Hooksett, New Hampshire, United States, vi) Rosewell Park Cancer Institute, Buffalo, New York, United States, vii) Hematology Oncology Associates of Central New York, East Syracuse, New York, United States, viii) Ohio State University, Columbus, Ohio, United States, ix) Vermont Cancer Center, Burlington, Vermont, United States |
| CHAMP: A Randomized Controlled Trial of High-intensity Aerobic and Resistance Exercise for Metastatic Prostate Cancer                                                                                               | Prostate Cancer                                          | University of California, San Francisco, San Francisco, California, United States                                                                                                                                                                                                                                                                                                                                                                                                                                                                                                                                                                                                                                      |
| Randomized Controlled Trial Evaluating the Role of Exercise in Women Undergoing Treatment for Breast Cancer                                                                                                         | Non Metastatic Operable Breast Cancer                    | Tata Memorial Hospital, Mumbai, Maharashtra, India                                                                                                                                                                                                                                                                                                                                                                                                                                                                                                                                                                                                                                                                     |
| Pre Radiotherapy Daily Exercise Training in Non-Small Cell Lung Cancer                                                                                                                                              | i) Non-Small Cell Lung Cancer Stage, ii) Chemoradiation  | University Hospital of Copenhagen, Copenhagen, Denmark                                                                                                                                                                                                                                                                                                                                                                                                                                                                                                                                                                                                                                                                 |
| Doctor-Recommended Home-Based Exercise Program or Relaxation Training in Improving Physical Function and Controlling Symptoms in Patients With Stage IV or Recurrent Colon Cancer That Cannot Be Removed By Surgery | Colorectal Cancer                                        | University of Texas MD Anderson Cancer Center, Houston, Texas, United States                                                                                                                                                                                                                                                                                                                                                                                                                                                                                                                                                                                                                                           |
| Trial of Exercise to Reduce Cancer Related Fatigue in Breast Cancer                                                                                                                                                 | Breast Cancer                                            | Hackensack University Medical Center, Hackensack, New Jersey, United States                                                                                                                                                                                                                                                                                                                                                                                                                                                                                                                                                                                                                                            |
| Feasibility of Measuring Exercise's Effects on Molecular Mechanisms of Disease Progression in Prostate Cancer                                                                                                       | Prostate Cancer                                          | Vancouver Prostate Centre, Vancouver, British Columbia, Canada                                                                                                                                                                                                                                                                                                                                                                                                                                                                                                                                                                                                                                                         |
| Qigong For PPSP In Breast Cancer Pain In Breast Cancer Survivors                                                                                                                                                    | Breast cancer                                            | Dana-Farber Cancer Institute, Boston, Massachusetts, United States                                                                                                                                                                                                                                                                                                                                                                                                                                                                                                                                                                                                                                                     |
| UW WELL-FIT Exercise Program for Cancer Patients                                                                                                                                                                    | N/A                                                      | University of Waterloo, Waterloo, Ontario, Canada                                                                                                                                                                                                                                                                                                                                                                                                                                                                                                                                                                                                                                                                      |
| Efficacy of Exercise Using Connected Activity Trackers and Therapeutic Education in Localized Breast Cancer                                                                                                         | Breast cancer                                            | i) Institut Sainte-Catherine, Avignon, France, ii) CHRU Besançon, Besançon, France, iii) Centre Léon Bérard, Lyon, France                                                                                                                                                                                                                                                                                                                                                                                                                                                                                                                                                                                              |
| Exercise in Testicular Germ Cell Cancer Survivors                                                                                                                                                                   | Testicular Germ Cell Tumor                               | i) National Cancer Institute, Bratislava, Please Select, Slovakia, ii) Biomedical Research Center Slovak Academy of Sciences, Bratislava, Please Select, Slovakia                                                                                                                                                                                                                                                                                                                                                                                                                                                                                                                                                      |

|                                                                                                                                                                             |                              |                                                                                                                                                                                                                                                                                                                                                                                                                                                                                                                                                                                |
|-----------------------------------------------------------------------------------------------------------------------------------------------------------------------------|------------------------------|--------------------------------------------------------------------------------------------------------------------------------------------------------------------------------------------------------------------------------------------------------------------------------------------------------------------------------------------------------------------------------------------------------------------------------------------------------------------------------------------------------------------------------------------------------------------------------|
| A Single Arm Pilot Study to Refine a Novel Approach to Exercise Promotion Based on Affect-regulation                                                                        | Breast Cancer                | Dartmouth-Hitchcock Health, Lebanon, New Hampshire, United States                                                                                                                                                                                                                                                                                                                                                                                                                                                                                                              |
| Physical Activity, Proliferation and Immune Markers in Benign Breast Tissue                                                                                                 | Breast Cancer                | Dana Farber Cancer Institute, Boston, Massachusetts, United States                                                                                                                                                                                                                                                                                                                                                                                                                                                                                                             |
| Supervised Aerobic Training During or After Chemotherapy for Operable Breast Cancer                                                                                         | Breast Cancer                | Memorial Sloan Kettering Cancer Center, New York, New York, United States                                                                                                                                                                                                                                                                                                                                                                                                                                                                                                      |
| CanMove: A Physical Activity Program for Children With Cancer                                                                                                               | Pediatric Cancer             | Royal Children's Hospital, Parkville, Victoria, Australia                                                                                                                                                                                                                                                                                                                                                                                                                                                                                                                      |
| Physical Activity for Advanced Stage Cancer Patients                                                                                                                        | N/A                          | H. Lee Moffitt Cancer Center and Research Institute, Tampa, Florida, United States                                                                                                                                                                                                                                                                                                                                                                                                                                                                                             |
| Diet, Exercise and Vitamin D in Breast Cancer Recurrence                                                                                                                    | Breast Cancer                | i) Centro Riferimento Oncologico, Aviano, Italy, ii) Azienda Ospedaliera Cannizzaro, Catania, Italy, iii) Clinica Mediterranea, Napoli, Italy, iv) Istituto Nazionale Tumori Fondazione G. Pascale, Napoli, Italy, v) Ospedale dei Colli Monaldi, Napoli, Italy, vi) Ospedale Evangelico Betania, Napoli, Italy, vii) Ospedale San Vincenzo, Taormina, Italy                                                                                                                                                                                                                   |
| Physical Activity in Patients With Metastatic Colorectal Cancer Who Receive Palliative First-line Chemotherapy                                                              | Metastatic Colorectal Cancer | i) Universitätsklinikum der PMU Salzburg, Salzburg, Austria, ii) Klinikum Wels-Grieskirchen GmbH, Wels, Austria, iii) Tumor Zentrum Aarau, Aarau, Switzerland, iv) Kantonsspital Aarau, Aarau, Switzerland, v) Kantonsspital Baden, Baden, Switzerland, vi) St. Claraspital, Basel, Switzerland, vii) Clinical Cancer Research Center at University Hospital Basel, Basel, Switzerland, viii) Istituto Oncologico della Svizzera Italiana IOSI, Bellinzona, Switzerland, ix) Spitalzentrum Biel, Biel, Switzerland, x) Spitalzentrum Oberwallis, Brig, Switzerland and 14 more |
| Exercise Intervention in Preventing Breast Cancer Recurrence in Postmenopausal Breast Cancer Survivors                                                                      | Breast Cancer                | City of Hope Medical Center, Duarte, California, United States                                                                                                                                                                                                                                                                                                                                                                                                                                                                                                                 |
| The Preoperative Health & Body Study                                                                                                                                        | Breast Cancer                | Dana-Farber Cancer Institute, Boston, Massachusetts, United States                                                                                                                                                                                                                                                                                                                                                                                                                                                                                                             |
| Intensive Diet and Exercise or Standard of Care in Improving Physical Function and Quality of Life in Patients With Prostate Cancer Undergoing Androgen Deprivation Therapy | Prostate Cancer              | Arthur G. James Cancer Hospital and Solove Research Institute at Ohio State University Medical Center, Columbus, Ohio, United States                                                                                                                                                                                                                                                                                                                                                                                                                                           |
| The SEHNeCa Supervised Exercise Project                                                                                                                                     | Neack and Head Cancer        | Biocruces Bizkaia research health institute, Barakaldo, Bizkaia, Spain                                                                                                                                                                                                                                                                                                                                                                                                                                                                                                         |
| Exercise Therapy in Radiation Therapy                                                                                                                                       | Metastatic Cancer            | Penn State Cancer Institute, Hershey, Pennsylvania, United States                                                                                                                                                                                                                                                                                                                                                                                                                                                                                                              |
| FOCUS on Reducing Dose-limiting Toxicities in Colon Cancer With Resistance Exercise Study                                                                                   | Colon Cancer                 | i) Kaiser Permanente Division of Research, Oakland, California, United States, ii) Dana Farber Cancer Institute, Boston, Massachusetts, United States, iii) Penn State Cancer Institute, Hershey, Pennsylvania, United States                                                                                                                                                                                                                                                                                                                                                  |
| Trial Comparing the Effects of Linear Versus Nonlinear Aerobic Training in Women With Operable Breast Cancer                                                                | Breast Cancer                | Memorial Sloan Kettering Cancer Center, New York, New York, United States                                                                                                                                                                                                                                                                                                                                                                                                                                                                                                      |
| Energy Balance and Breast Cancer Aspects-II                                                                                                                                 | Breast Cancer                | i) Oslo University Hospital, Oslo, Norway, ii) St. Olavs Hospital, Trondheim, Norway                                                                                                                                                                                                                                                                                                                                                                                                                                                                                           |
| Development of Patient Tailored Guideline of Physical Activity for Lung Cancer                                                                                              | Lung Cancer                  | Samsung Medical Center, Seoul, Korea                                                                                                                                                                                                                                                                                                                                                                                                                                                                                                                                           |
| Methylphenidate and Physical Activity to Reduce Cancer Related Fatigue Due to Anti PD1 Immunotherapy                                                                        | Malignant Neoplasm           | M D Anderson Cancer Center, Houston, Texas, United States                                                                                                                                                                                                                                                                                                                                                                                                                                                                                                                      |
| Narrative Visualization for Breast Cancer Survivors' Physical Activity                                                                                                      | Breast Cancer                | The University of Texas Medical Branch, Galveston, Texas, United States                                                                                                                                                                                                                                                                                                                                                                                                                                                                                                        |
| An Early Stress-Reduction Intervention in Patients With Newly Diagnosed Breast Cancer                                                                                       | Malignant Neoplasm of Breast | University of Texas MD Anderson Cancer Center, Houston, Texas, United States                                                                                                                                                                                                                                                                                                                                                                                                                                                                                                   |
| Adapted Physical Activity (APA) in a Breast Cancer Population.                                                                                                              | Breast Cancer                | University of Perugia, Perugia, Italy                                                                                                                                                                                                                                                                                                                                                                                                                                                                                                                                          |
| Physical Activity and Dexamethasone in Reducing Cancer-Related Fatigue in Patients With Advanced Cancer                                                                     | Malignant Neoplasm of Breast | M D Anderson Cancer Center, Houston, Texas, United States                                                                                                                                                                                                                                                                                                                                                                                                                                                                                                                      |
| The Effects of Moderate Exercise on Distress, Quality of Life, and Biomarkers of Angiogenesis and Chronic Stress in Ovarian Cancer Survivors                                | Ovarian Cancer               | Fred Hutch/University of Washington Cancer Consortium, Seattle, Washington, United States                                                                                                                                                                                                                                                                                                                                                                                                                                                                                      |
| High-Flow Oxygen in Reducing Shortness of Breath Caused by Exercise in Patients With Cancer                                                                                 | Malignant Neoplasm           | M D Anderson Cancer Center, Houston, Texas, United States                                                                                                                                                                                                                                                                                                                                                                                                                                                                                                                      |

|                                                                                                                                                                              |                                                                                                     |                                                                                                                                                                                                                                                                                                                                                                                                                                                                                                                                                                                                                                                                                                                                                                                                     |
|------------------------------------------------------------------------------------------------------------------------------------------------------------------------------|-----------------------------------------------------------------------------------------------------|-----------------------------------------------------------------------------------------------------------------------------------------------------------------------------------------------------------------------------------------------------------------------------------------------------------------------------------------------------------------------------------------------------------------------------------------------------------------------------------------------------------------------------------------------------------------------------------------------------------------------------------------------------------------------------------------------------------------------------------------------------------------------------------------------------|
| Physical Training and Cancer-a Multicenter Clinical Trial                                                                                                                    | i) Breast Cancer, ii) Colorectal Cancer, iii) Prostate Cancer                                       | i) Uppsala University, ii) The Swedish Research Council, iii) Swedish Cancer Society, iv) Nordic Cancer Union, v) Linköping University, vi) Lund University, vii) University of Agder, viii) Copenhagen University Hospital-Denmark, ix) Norwegian School of Sport Sciences, x) Amsterdam UMC-location VUmc and 2 more                                                                                                                                                                                                                                                                                                                                                                                                                                                                              |
| Web-Based Physical Activity Intervention in Improving Long Term Health in Children and Adolescents With Cancer                                                               | i) Carcinoma In Situ, ii) Hematopoietic and Lymphoid System Neoplasm, iii) Malignant Solid Neoplasm | i) Children's Hospital of Alabama, Birmingham, Alabama, United States, ii) Phoenix Childrens Hospital, Phoenix, Arizona, United States, iii) Banner University Medical Center - Tucson, Tucson, Arizona, United States, iv) Arkansas Children's Hospital, Little Rock, Arkansas, United States, v) Kaiser Permanente Downey Medical Center, Downey, California, United States, vi) City of Hope Comprehensive Cancer Center, Duarte, California, United States, vii) Miller Children's and Women's Hospital Long Beach, Long Beach, California, United States, viii) Valley Children's Hospital, Madera, California, United States, ix) UCSF Benioff Children's Hospital Oakland, Oakland, California, United States, x) Kaiser Permanente-Oakland, Oakland, California, United States and 102 more |
| Game-Based Physical Activity in Childhood Cancer Survivors                                                                                                                   | Childhood Cancer                                                                                    | Memorial Sloan Kettering Cancer Center, New York, New York, United States                                                                                                                                                                                                                                                                                                                                                                                                                                                                                                                                                                                                                                                                                                                           |
| Physical Activity in Relation to Surgical Procedures                                                                                                                         | Colorectal Cancer                                                                                   | i) Sahlgrenska University Hospital/Östra, Göteborg, Sweden, ii) Dept. of Surgery, Skaraborgs Sjukhus, Skövde, Sweden                                                                                                                                                                                                                                                                                                                                                                                                                                                                                                                                                                                                                                                                                |
| Feasibility of Lifestyle Intervention in BRCA1/2 Mutation Carriers                                                                                                           | Hereditary Breast and Ovarian Cancer                                                                | i) University of Cologne, Cologne, Germany, ii) University of Schleswig-Holstein Campus Kiel, Kiel, Germany, iii) Technische Universitaet Muenchen, Munich, Germany                                                                                                                                                                                                                                                                                                                                                                                                                                                                                                                                                                                                                                 |
| Health and Recovery Program in Increasing Physical Activity Level in Stage IA-IIIa Endometrial Cancer Survivors                                                              | Endometrial Carcinoma                                                                               | i) Stanford University, School of Medicine, Palo Alto, California, United States, ii) Stanford Cancer Center South Bay, San Jose, California, United States                                                                                                                                                                                                                                                                                                                                                                                                                                                                                                                                                                                                                                         |
| Multimodal Therapy for the Treatment of Fatigue in Patients With Prostate Cancer Receiving Radiotherapy With Androgen Deprivation Therapy                                    | Prostate Cancer                                                                                     | University of Texas MD Anderson Cancer Center, Houston, Texas, United States                                                                                                                                                                                                                                                                                                                                                                                                                                                                                                                                                                                                                                                                                                                        |
| Prehabilitation for Women Undergoing Pre-operative Chemotherapy for Breast Cancer                                                                                            | Breast Cancer                                                                                       | Sunnybrook Health Sciences Centre, Toronto, Ontario, Canada                                                                                                                                                                                                                                                                                                                                                                                                                                                                                                                                                                                                                                                                                                                                         |
| Lifestyle, Exercise, and Nutrition Study Early After Diagnosis                                                                                                               | Breast Neoplasms                                                                                    | i) Yale University, New Haven, Connecticut, United States, ii) Dana Farber Cancer Center, Boston, Massachusetts, United States                                                                                                                                                                                                                                                                                                                                                                                                                                                                                                                                                                                                                                                                      |
| Pink Warrior 2: Teleconference-based Gaming Support                                                                                                                          | Breast Cancer                                                                                       | i) The University of Texas Medical Branch, Galveston, Texas, United States, ii) UT MD Anderson Cancer Center, Houston, Texas, United States                                                                                                                                                                                                                                                                                                                                                                                                                                                                                                                                                                                                                                                         |
| The Patterns of Activity and Cognition During Treatment (PACT) Study                                                                                                         | Breast Cancer                                                                                       | University of Nebraska Medical Center, Omaha, Nebraska, United States                                                                                                                                                                                                                                                                                                                                                                                                                                                                                                                                                                                                                                                                                                                               |
| Multimodal Intervention for Cachexia in Advanced Cancer Patients Undergoing Chemotherapy                                                                                     | Neoplasms                                                                                           | i) Cedars-Sinai Medical Center, Los Angeles, California, United States, ii) CA4 Brampton Civic Hospital, Brampton, Canada, iii) Cross Cancer Institute, Edmonton, Canada, iv) Jewish General Hospital, Montréal, Canada, v) Ottawa Regional Cancer Centre, Ottawa, Canada, vi) Universitätsklinikum Bonn, Bonn, Germany, vii) Oslo University Hospital, Oslo, Norway, viii) St Olavs Hospital, Trondheim, Norway, ix) Tumor Zentrum, Aarau, Switzerland, x) Cantonal Hospital, St. Gallen, Switzerland and 7 more                                                                                                                                                                                                                                                                                   |
| Feasibility of the NEXT Steps Weight Loss Intervention +/- Resistance Training for Endometrial Cancer Survivors: Effect on Lean Mass & Biomarkers                            | Malignant Neoplasms of Female Genital Organs                                                        | University of Texas MD Anderson Cancer Center, Houston, Texas, United States                                                                                                                                                                                                                                                                                                                                                                                                                                                                                                                                                                                                                                                                                                                        |
| Exercise Intervention for Bone Tumor Patients                                                                                                                                | Bone Sarcoma                                                                                        | University Hospital Essen, Essen, NRW, Germany                                                                                                                                                                                                                                                                                                                                                                                                                                                                                                                                                                                                                                                                                                                                                      |
| Anamorelin Hydrochloride, Physical Activity, and Nutritional Counseling in Decreasing Cancer-Related Fatigue in Patients With Incurable Metastatic or Recurrent Solid Tumors | Metastatic or Recurrent Malignant Solid Neoplasm                                                    | M D Anderson Cancer Center, Houston, Texas, United States                                                                                                                                                                                                                                                                                                                                                                                                                                                                                                                                                                                                                                                                                                                                           |
| Avanzando Juntas: Adapting an Evidence Based Weight Loss Program for Hispanic Breast Cancer Survivors                                                                        | i) Breast Cancer, ii) Gynecologic Cancer                                                            | Medical College of Wisconsin, Milwaukee, Wisconsin, United States                                                                                                                                                                                                                                                                                                                                                                                                                                                                                                                                                                                                                                                                                                                                   |
| Exercise Effect on Chemotherapy-Induced Neuropathic Pain                                                                                                                     | i) Breast cancer, ii) Colorectal cancer, iii) Lung cancer, iv) Ovarian cancer                       | Baltimore VA Medical Center, Baltimore, Maryland, United States                                                                                                                                                                                                                                                                                                                                                                                                                                                                                                                                                                                                                                                                                                                                     |
| Aerobic Training in Metastatic Breast Cancer                                                                                                                                 | Metastatic Breast Cancer                                                                            | i) Memorial Sloan Kettering Cancer Center, New York, New York, United States, ii) Duke University Medical Center, Durham, North Carolina, United States                                                                                                                                                                                                                                                                                                                                                                                                                                                                                                                                                                                                                                             |
| Lifestyle, Exercise and Nutrition Study 2 (LEAN 2)                                                                                                                           | Breast Cancer                                                                                       | Yale University, New Haven, Connecticut, United States                                                                                                                                                                                                                                                                                                                                                                                                                                                                                                                                                                                                                                                                                                                                              |
| Develop and Test the 'Multi-Faced Continuous Exercise Program' in Operable Head and Neck Cancer Patients                                                                     | Head and Neck Squamous Cell Carcinoma                                                               | National Taiwan University Hospital                                                                                                                                                                                                                                                                                                                                                                                                                                                                                                                                                                                                                                                                                                                                                                 |

|                                                                                                                                  |                                                                                       |                                                                                                                                                                                                                                                                                                                                                                                                                                                                                                                                                                                                         |
|----------------------------------------------------------------------------------------------------------------------------------|---------------------------------------------------------------------------------------|---------------------------------------------------------------------------------------------------------------------------------------------------------------------------------------------------------------------------------------------------------------------------------------------------------------------------------------------------------------------------------------------------------------------------------------------------------------------------------------------------------------------------------------------------------------------------------------------------------|
| Role of Individualized Intervention(s) in Hormone-Receptor Positive Early-stage Breast Cancer                                    | Breast Cancer                                                                         | i) Allan Blair Cancer Center, Regina, Saskatchewan, Canada, ii) Saskatoon Cancer Center, Saskatoon, Saskatchewan, Canada                                                                                                                                                                                                                                                                                                                                                                                                                                                                                |
| Gentle Yoga and Dietary Counseling in Improving Physical Function and Quality of Life in Stage I-II Endometrial Cancer Survivors | Endometrial Carcinoma                                                                 | Arthur G. James Cancer Hospital and Solove Research Institute at Ohio State University Medical Center, Columbus, Ohio, United States                                                                                                                                                                                                                                                                                                                                                                                                                                                                    |
| The Prehabilitation Study: Exercise Before Surgery to Improve Patient Function in People                                         | i) Intraabdominal cancer, ii) Thoracic cancer                                         | The Ottawa Hospital, General Campus, Ottawa, Ontario, Canada                                                                                                                                                                                                                                                                                                                                                                                                                                                                                                                                            |
| Cycling in Preventing Colorectal Cancer in Participants With Lynch Syndrome                                                      | Lynch Syndrome                                                                        | M D Anderson Cancer Center, Houston, Texas, United States                                                                                                                                                                                                                                                                                                                                                                                                                                                                                                                                               |
| Heal-Me Personalized Online Nutrition and Exercise Routines                                                                      | N/A                                                                                   | University of Alberta, Edmonton, Alberta, Canada                                                                                                                                                                                                                                                                                                                                                                                                                                                                                                                                                        |
| Activity Program During Aromatase Inhibitor Therapy                                                                              | Early Breast Cancer                                                                   | i) Kantonsspital Aarau, Aarau, Switzerland, ii) Kantonsspital Baden, Baden, Switzerland, iii) CABA - Zentrum für Onkologie, Psychologie und Bewegung, Basel, Switzerland, iv) Brustzentrum Basel - Praxis für ambulante Tumorthérapie, Basel, Switzerland, v) Universitätsspital Basel, Basel, Switzerland, vi) Inselspital Bern, Bern, Switzerland, vii) Hirslanden Brustzentrum Bern Biel, Bern, Switzerland, viii) Kantonsspital Graubünden, Chur, Switzerland, ix) Tumorzentrum ZeTuP Chur, Chur, Switzerland, x) Clinique des Grangettes, Centre du sein, Chêne-Bougeries, Switzerland and 22 more |
| Lifestyle Change for Better Health                                                                                               | i) Bladder Cancer, ii) Colorectal Adenoma                                             | UPMC Shadyside, Pittsburgh, Pennsylvania, United States                                                                                                                                                                                                                                                                                                                                                                                                                                                                                                                                                 |
| Prostate Cancer - Patient Empowerment Program                                                                                    | Prostate Cancer                                                                       | QEII Health Sciences Centre, Halifax, Nova Scotia, Canada                                                                                                                                                                                                                                                                                                                                                                                                                                                                                                                                               |
| Tai Chi for Relieving Aromatase Inhibitor-Induced Arthralgia in Patients With Stage I-III Breast Cancer, the TaiChi4Joint Trial  | Breast Cancer                                                                         | Thomas Jefferson University Hospital, Philadelphia, Pennsylvania, United States                                                                                                                                                                                                                                                                                                                                                                                                                                                                                                                         |
| Sensorimotor Rehabilitation Program in Improving Quality of Life in Patients With Early Stage Breast Cancer                      | Breast Cancer                                                                         | Ohio State University Comprehensive Cancer Center, Columbus, Ohio, United States                                                                                                                                                                                                                                                                                                                                                                                                                                                                                                                        |
| Exercise Prescription for the Improvement of Quality of Life in Elderly Patients With Multiple Myeloma                           | Plasma Cell Myeloma                                                                   | Sidney Kimmel Cancer Center at Thomas Jefferson University, Philadelphia, Pennsylvania, United States                                                                                                                                                                                                                                                                                                                                                                                                                                                                                                   |
| Weight Management and Health Behavior Intervention in Lowering Cancer Risk for BRCA Positive and Lynch Syndrome Families         | i) Hereditary Breast Carcinoma, ii) Hereditary Ovarian Carcinoma, iii) Lynch Syndrome | M D Anderson Cancer Center, Houston, Texas, United States                                                                                                                                                                                                                                                                                                                                                                                                                                                                                                                                               |
| The Role of Lifestyle Factors in Breast Cancer-Related Outcomes                                                                  | Breast Cancer                                                                         | M D Anderson Cancer Center, Houston, Texas, United States                                                                                                                                                                                                                                                                                                                                                                                                                                                                                                                                               |
| Exercise and Quality Diet After Leukemia: The EQUAL Study                                                                        | Adult Survivors of Childhood Leukemia                                                 | i) Memorial Sloan Kettering Cancer Center, New York, New York, United States, ii) St. Jude Children's Research Hospital Memphis, Tennessee, United States                                                                                                                                                                                                                                                                                                                                                                                                                                               |
| Tibetan Yoga in Improving Fatigue and Sleep in Participants With Stage I-III Breast Cancer                                       | Breast Cancer                                                                         | M D Anderson Cancer Center, Houston, Texas, United States                                                                                                                                                                                                                                                                                                                                                                                                                                                                                                                                               |
| MoveStrong at Home                                                                                                               | N/A                                                                                   | University of Waterloo, Waterloo, Canada                                                                                                                                                                                                                                                                                                                                                                                                                                                                                                                                                                |
